# Supplementary material for: Tumor-Derived Factors Differentially Affect the Recruitment and Plasticity of Neutrophils
Source: MDPI journal article supplement (doi:10.3390/cancers13205082), 2021-10-11
Supplement: s1 [file Supplementary Figures Legends_ProofRead final_11.10.21.pdf › Supplementary Figures Legends_ProofRead final_11.10.21.pdf]

## SUPPLEMENTARY MATERIALS

### SUPPLEMENTARY FIGURE LEGENDS

**Supplementary Figure 1. Competitive vs non-competitive NDN and LDN tumor infiltration ex vivo in a 4T1 model.** (A) Dose-response of NDN vs LDN ex vivo infiltration after 2 hours of incubation in the presence of 4T1 tumor slices. Bar plots showing the quantification of neutrophils' infiltration (mean  $\pm$  SEM,  $n = 4-17$ ) are presented. 1M, 2M, and 3M indicate the amount of NDN or LDN incubated with the tumor,  $1 \times 10^6$ ,  $2 \times 10^6$ , or  $3 \times 10^6$  respectively. (B)  $2 \times 10^6$  NDN or  $2 \times 10^6$  LDN were incubated in the presence of a 4T1 tumor slice for 1- or 2-hours. The quantification of NDN vs LDN tumor infiltration are shown (mean  $\pm$  SEM,  $n = 6-17$ ). Each dot represents one sample. Statistical analysis in A and B was performed using a non-paired two-tailed  $t$ -test, \*\*\*  $p < 0.001$ . (C)  $2 \times 10^6$  NDN +  $2 \times 10^6$  LDN co-infiltration in the tumor tissue ex vivo following 1- or 2-hours incubation). The number of infiltrating NDN and LDN following incubation together with a tumor slice is shown. Statistical analysis was performed using a paired two-tailed  $t$ -test, \*  $p < 0.05$ , \*\*  $p < 0.01$ .

**Supplementary Figure 2. CXCR2 and CXCR4 expression levels on neutrophil subpopulations in the AB12 model.** CXCR2 and CXCR4 surface expression on NDN, LDN and TANs derived from AB12 tumor-bearing mice (mean  $\pm$  SEM,  $n = 7-16$ ). Significant differences between NDN and LDN are expressed with a star (i.e., \*), while the comparison between TANs and NDN, or TANs and LDN is expressed with  $\zeta$ . Statistical analysis was performed using a one-way ANOVA with Tukey post-hoc test, \*\*\*  $p < 0.001$ , and  $\zeta = p < 0.0001$ .

**Supplementary Figure 3. CXCL1, G-CSF and TNF $\alpha$  do not impact NDN transition towards an LD-state in the 4T1 model.** Phenotypical changes induced by CXCL1, G-CSF and TNF $\alpha$  on the plasticity of 4T1-derived NDN (mean  $\pm$  SEM,  $n = 5-12$ ). Statistical analyses were performed using an unpaired two-tailed  $t$ -test, \*  $p < 0.05$ .

**Supplementary Figure 4. Blocking CXCR2 receptor in 4T1-TCM significantly reduces the amount of LD-NDN found in the LD in 4T1-derived neutrophils.** Effect of CXCR2 inhibitor in 4T1-TCM on NDN plasticity (mean  $\pm$  SEM,  $n = 3-6$ ). Comparison between 4T1-TCM and 4T1-TCM+ $\alpha$ CXCR2 was performed using a paired two-tailed  $t$ -test, \*  $p < 0.05$ .
