# Supplementary figures and images for: Tumor-Derived Factors Differentially Affect the Recruitment and Plasticity of Neutrophils
Source: MDPI journal article supplement (doi:10.3390/cancers13205082), 2021-10-11

**A**

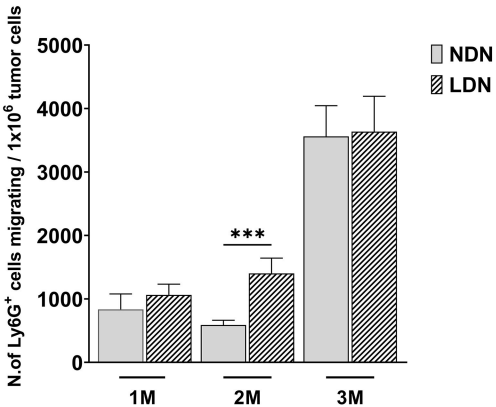

**B**

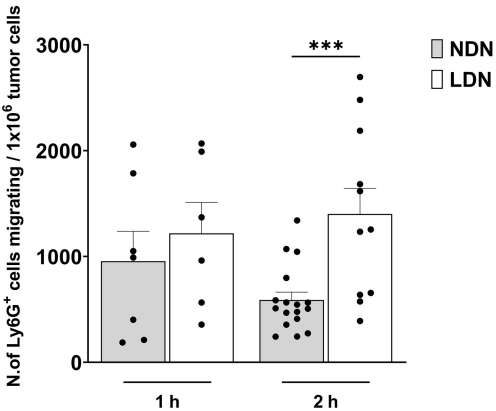

**C**

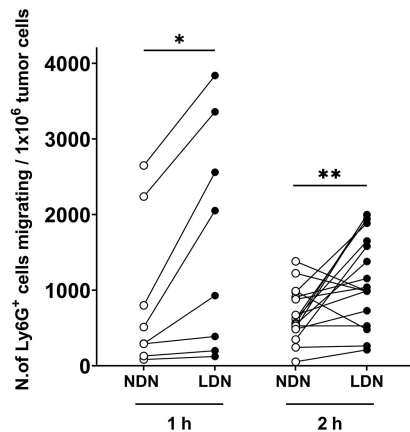

Supplement: s1 [file Supplementary figure 1.pdf › Supplementary figure 1.pdf]

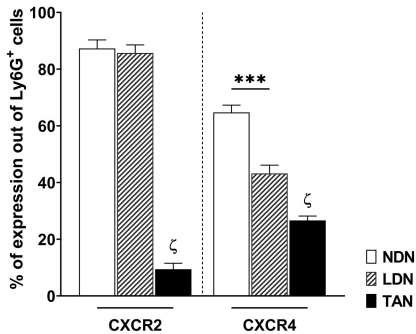

Supplement: s1 [file Supplementary figure 2.pdf › Supplementary figure 2.pdf]

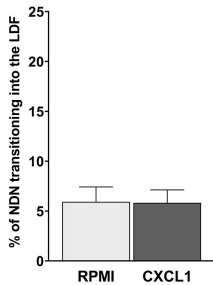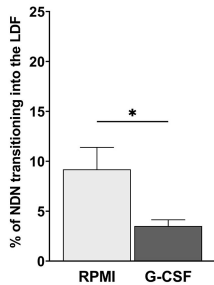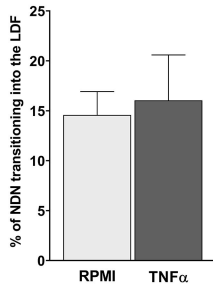

Supplement: s1 [file Supplementary figure 3.pdf › Supplementary figure 3.pdf]

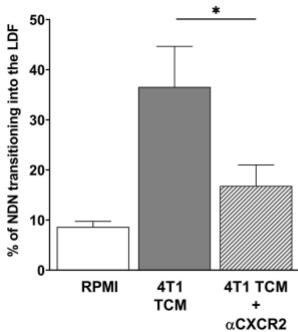

Supplement: s1 [file Supplementary figure 4.pdf › Supplementary figure 4.pdf]
